# Supplementary material
Source: HighWire-hosted journal article supplement (https://www.cfp.ca/highwire/filestream/36199/field_highwire_adjunct_files/0/Search_Terms.pdf)
Supplement: Search_Terms.pdf [file Search_Terms.pdf]

## **Supplementary File**

### **Appendix A: PubMed Search Terms:**

(COVID-19 OR COVID OR Coronavirus OR "Corona Virus" OR nCOV OR 2019-nCoV OR SARS-Coronavirus-2 OR SARS-CoV-2 OR 2019nCoV OR SARSCoV2 OR SARS-CoV2 OR SARSCoV-2) AND (Medicat\* OR Therapy OR Therapies OR Therapeutic\* OR Treatment\* OR Drug OR Drugs OR Interven\*) AND ("2019/11/17"[PDAT] : "2020/03/25"[PDAT])

#### *Updated PubMed Search:*

(COVID-19 OR COVID OR Coronavirus OR "Corona Virus" OR nCOV OR 2019-nCoV OR SARS-Coronavirus-2 OR SARS-CoV-2 OR 2019nCoV OR SARSCoV2 OR SARS-CoV2 OR SARSCoV-2) AND (Medicat\* OR Therapy OR Therapies OR Therapeutic\* OR Treatment\* OR Drug OR Drugs OR Interven\*) AND ("2020/03/26"[PDAT] : "2020/04/12"[PDAT])

### **Appendix B: Embase Search Terms:**

Database(s): Embase 1974 to 2020 March 26

| #  | Searches                                                          |
|----|-------------------------------------------------------------------|
| 1  | COVID-19.mp.                                                      |
| 2  | exp betacoronavirus/                                              |
| 3  | COVID.mp.                                                         |
| 4  | Coronavirus.mp.                                                   |
| 5  | Corona Virus.mp.                                                  |
| 6  | nCOV.mp.                                                          |
| 7  | 2019-nCoV.mp.                                                     |
| 8  | SARS-Coronavirus-2.mp.                                            |
| 9  | SARS-CoV-2.mp.                                                    |
| 10 | 2019nCoV.mp.                                                      |
| 11 | SARSCoV2.mp.                                                      |
| 12 | SARS-CoV2.mp.                                                     |
| 13 | SARSCoV-2.mp.                                                     |
| 14 | 1 or 2 or 3 or 4 or 5 or 6 or 7 or 8 or 9 or 10 or 11 or 12 or 13 |
| 15 | Medicat*.mp.                                                      |
| 16 | Therap*.mp.                                                       |
| 17 | Treatment*.mp.                                                    |
| 18 | Drug*.mp.                                                         |
| 19 | Interven*.mp.                                                     |
| 20 | 15 or 16 or 17 or 18 or 19                                        |
| 21 | 14 and 20                                                         |
| 22 | limit 21 to dd=20191117-20200325                                  |

*Updated Embase Search:*

Database(s): Embase 1974 to 2020 March 26

| #  | Searches                                                          |
|----|-------------------------------------------------------------------|
| 1  | COVID-19.mp.                                                      |
| 2  | exp betacoronavirus/                                              |
| 3  | COVID.mp.                                                         |
| 4  | Coronavirus.mp.                                                   |
| 5  | Corona Virus.mp.                                                  |
| 6  | nCOV.mp.                                                          |
| 7  | 2019-nCoV.mp.                                                     |
| 8  | SARS-Coronavirus-2.mp.                                            |
| 9  | SARS-CoV-2.mp.                                                    |
| 10 | 2019nCoV.mp.                                                      |
| 11 | SARSCoV2.mp.                                                      |
| 12 | SARS-CoV2.mp.                                                     |
| 13 | SARSCoV-2.mp.                                                     |
| 14 | 1 or 2 or 3 or 4 or 5 or 6 or 7 or 8 or 9 or 10 or 11 or 12 or 13 |
| 15 | Medicat*.mp.                                                      |
| 16 | Therap*.mp.                                                       |
| 17 | Treatment*.mp.                                                    |
| 18 | Drug*.mp.                                                         |
| 19 | Interven*.mp.                                                     |
| 20 | 15 or 16 or 17 or 18 or 19                                        |
| 21 | 14 and 20                                                         |
| 22 | limit 21 to dd=20200326-20200412                                  |

## Appendix C: MEDLINE Search Terms:

Database(s): Ovid MEDLINE(R) ALL 1946 to March 26, 2020

| #  | Searches                |
|----|-------------------------|
| 1  | COVID-19.mp.            |
| 2  | Coronavirus Infections/ |
| 3  | Pneumonia, Viral/       |
| 4  | COVID.mp.               |
| 5  | Betacoronavirus/        |
| 6  | Coronavirus.mp.         |
| 7  | Corona Virus.mp.        |
| 8  | nCOV.mp.                |
| 9  | 2019-nCoV.mp.           |
| 10 | SARS-Coronavirus-2.mp.  |

|    |                                                                               |
|----|-------------------------------------------------------------------------------|
| 11 | SARS-CoV-2.mp.                                                                |
| 12 | 2019nCoV.mp.                                                                  |
| 13 | SARSCoV2.mp.                                                                  |
| 14 | SARS-CoV2.mp.                                                                 |
| 15 | SARSCoV-2.mp.                                                                 |
| 16 | 1 or 2 or 3 or 4 or 5 or 6 or 7 or 8 or 9 or 10 or 11 or 12 or 13 or 14 or 15 |
| 17 | Medicat*.mp.                                                                  |
| 18 | Therap*.mp.                                                                   |
| 19 | Treatment*.mp.                                                                |
| 20 | Drug*.mp.                                                                     |
| 21 | Interven*.mp.                                                                 |
| 22 | 17 or 18 or 19 or 20 or 21                                                    |
| 23 | 16 and 22                                                                     |
| 24 | limit 23 to updatrange="pmfc(20191117000000-20200325235959)"                  |

*Updated MEDLINE Search:*

Database(s): Ovid MEDLINE(R) ALL 1946 to March 26, 2020

| #  | Searches                                                                      |
|----|-------------------------------------------------------------------------------|
| 1  | COVID-19.mp.                                                                  |
| 2  | Coronavirus Infections/                                                       |
| 3  | Pneumonia, Viral/                                                             |
| 4  | COVID.mp.                                                                     |
| 5  | Betacoronavirus/                                                              |
| 6  | Coronavirus.mp.                                                               |
| 7  | Corona Virus.mp.                                                              |
| 8  | nCOV.mp.                                                                      |
| 9  | 2019-nCoV.mp.                                                                 |
| 10 | SARS-Coronavirus-2.mp.                                                        |
| 11 | SARS-CoV-2.mp.                                                                |
| 12 | 2019nCoV.mp.                                                                  |
| 13 | SARSCoV2.mp.                                                                  |
| 14 | SARS-CoV2.mp.                                                                 |
| 15 | SARSCoV-2.mp.                                                                 |
| 16 | 1 or 2 or 3 or 4 or 5 or 6 or 7 or 8 or 9 or 10 or 11 or 12 or 13 or 14 or 15 |
| 17 | Medicat*.mp.                                                                  |
| 18 | Therap*.mp.                                                                   |
| 19 | Treatment*.mp.                                                                |

|    |                                                                |
|----|----------------------------------------------------------------|
| 20 | Drug*.mp.                                                      |
| 21 | Interven*.mp.                                                  |
| 22 | 17 or 18 or 19 or 20 or 21                                     |
| 23 | 16 and 22                                                      |
| 24 | limit 23 to updaterrange="pmfc(20200325000000-20200412235959)" |
